# Supplementary material
Source: publisher figshare collection journal article supplement (https://acs.figshare.com/ndownloader/files/5773224)
Supplement: Supplementary file 1 [file 5773224]

#	Name:			E2_17A_PM3_ESP_MNDO
#	Creating user name:	tom
#	Creation time:		Sun Mar 22 14:45:38 1992

#	Modifying user name:	tom
#	Modification time:	Fri Jul  8 17:45:44 1994

@<TRIPOS>MOLECULE
E2_17A_PM3_ESP_MNDO
   44    47     1     5     0
SMALL
USER_CHARGES


@<TRIPOS>ATOM
      1 C1         -2.9348    0.3366   -0.4918 C.ar      1 OH        -0.1206 
      2 C2         -4.1426   -0.3433   -0.4826 C.ar      1 OH        -0.4310 
      3 C3         -4.1289   -1.7445   -0.4776 C.ar      1 OH         0.4613 
      4 C4         -2.9206   -2.4482   -0.4810 C.ar      1 OH        -0.4599 
      5 C5         -1.7130   -1.7484   -0.4877 C.ar      1 OH         0.1909 
      6 C6         -0.4459   -2.5422   -0.4673 C.3       1 OH        -0.1585 
      7 C7          0.7852   -1.7285   -0.8284 C.3       1 OH        -0.0752 
      8 C8          0.7659   -0.4035   -0.0832 C.3       1 OH        -0.1650 
      9 C9         -0.4360    0.4351   -0.5633 C.3       1 OH         0.0955 
     10 C10        -1.7163   -0.3470   -0.4913 C.ar      1 OH        -0.2061 
     11 C11        -0.5092    1.7544    0.2146 C.3       1 OH        -0.1079 
     12 C12         0.7849    2.5582    0.1154 C.3       1 OH        -0.2723 
     13 C13         1.9763    1.7102    0.5632 C.3       1 OH         0.1412 
     14 C14         2.0168    0.4362   -0.3155 C.3       1 OH         0.0440 
     15 C15         3.3867   -0.1676   -0.0252 C.3       1 OH        -0.0648 
     16 C16         4.3056    1.0443    0.1739 C.3       1 OH        -0.3102 
     17 C17         3.4031    2.2994    0.3421 C.3       1 OH         0.2795 
     18 C18         1.8489    1.3953    2.0571 C.3       1 OH        -0.5292 
     19 O3         -5.2694   -2.5023   -0.4701 O.3       1 OH        -0.6212 
     20 O1          3.5189    3.1956   -0.7307 O.3       1 OH        -0.7282 
     21 ****       -2.9188    1.4378   -0.4957 H         1 OH         0.1744 
     22 ****       -5.0861    0.2137   -0.4812 H         1 OH         0.2084 
     23 ****       -2.9211   -3.5451   -0.4786 H         1 OH         0.2475 
     24 ****       -0.3315   -2.9714    0.5495 H         1 OH         0.0682 
     25 ****       -0.5362   -3.4089   -1.1523 H         1 OH         0.0732 
     26 ****        1.7034   -2.2956   -0.5771 H         1 OH         0.0299 
     27 ****        0.8302   -1.5524   -1.9217 H         1 OH         0.0503 
     28 ****        0.6630   -0.6003    1.0184 H         1 OH         0.1267 
     29 ****       -0.2864    0.6784   -1.6477 H         1 OH         0.0634 
     30 ****       -1.3661    2.3526   -0.1675 H         1 OH         0.0613 
     31 ****       -0.7479    1.5485    1.2780 H         1 OH         0.0676 
     32 ****        0.9286    2.9084   -0.9266 H         1 OH         0.0662 
     33 ****        0.7102    3.4745    0.7326 H         1 OH         0.0963 
     34 ****        2.0143    0.7455   -1.3939 H         1 OH         0.0443 
     35 ****        3.3573   -0.8085    0.8767 H         1 OH         0.0607 
     36 ****        3.7323   -0.8218   -0.8461 H         1 OH         0.0328 
     37 ****        4.9439    0.9108    1.0658 H         1 OH         0.0772 
     38 ****        5.0036    1.1632   -0.6763 H         1 OH         0.1070 
     39 ****        3.7239    2.9407    1.1922 H         1 OH         0.1000 
     40 ****        2.7785    0.9771    2.4680 H         1 OH         0.1229 
     41 ****        1.0556    0.6517    2.2424 H         1 OH         0.1425 
     42 ****        1.6094    2.2983    2.6332 H         1 OH         0.1428 
     43 ****       -6.0105   -1.9095   -0.4705 H         1 OH         0.4377 
     44 H1          3.2318    2.7443   -1.5160 H         1 OH         0.4365 
@<TRIPOS>BOND
     1    1    2 ar   
     2   10    1 ar   
     3    2    3 ar   
     4    4    3 ar   
     5    3   19 1    
     6    5    4 ar   
     7    6    5 1    
     8   10    5 ar   
     9    7    6 1    
    10    8    7 1    
    11    8    9 1    
    12   14    8 1    
    13    9   10 1    
    14   11    9 1    
    15   12   11 1    
    16   13   12 1    
    17   13   14 1    
    18   17   13 1    
    19   13   18 1    
    20   15   14 1    
    21   16   15 1    
    22   17   16 1    
    23   20   44 1    
    24    1   21 1    
    25    2   22 1    
    26    4   23 1    
    27    6   24 1    
    28    6   25 1    
    29    7   26 1    
    30    7   27 1    
    31    8   28 1    
    32    9   29 1    
    33   11   30 1    
    34   11   31 1    
    35   12   32 1    
    36   12   33 1    
    37   14   34 1    
    38   15   35 1    
    39   15   36 1    
    40   16   37 1    
    41   16   38 1    
    42   20   17 1    
    43   18   40 1    
    44   18   41 1    
    45   18   42 1    
    46   19   43 1    
    47   17   39 1    
@<TRIPOS>SUBSTRUCTURE
     1 OH         20 PERM              0 ****  ****    0 ROOT 
@<TRIPOS>ROTATABLE_BOND
    5     4    46  1 1     0  0
@<TRIPOS>ANCHOR_ATOM
3
@<TRIPOS>NORMAL
@<TRIPOS>CRYSIN
12.055000 19.280001 6.632000 90.000000 90.000000 90.000000 18 1
